# Supplementary material for: Deep Learning-Based Intelligent Apple Variety Classification System and Model Interpretability Analysis
Source: MDPI journal article supplement (doi:10.3390/foods12040885), 2023-02-19

Figure.S1 Schematic of a pre-trained network with transfer learning, taking AlexNet as an example.

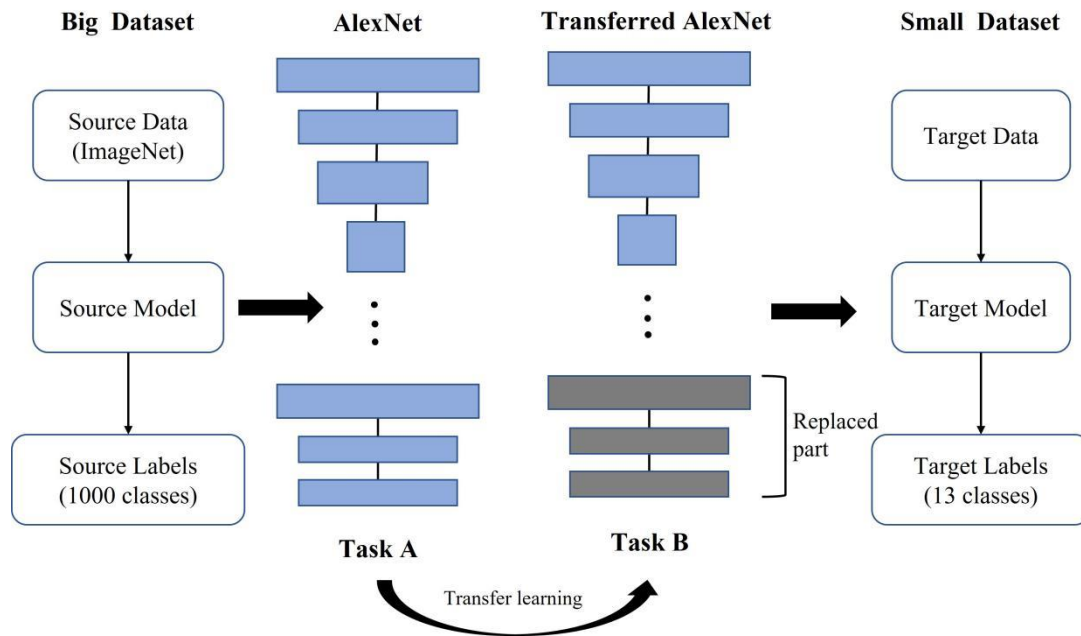

Figure.S2 Classification accuracy and cross-entropy loss for each epoch of training and validation on dataset A.

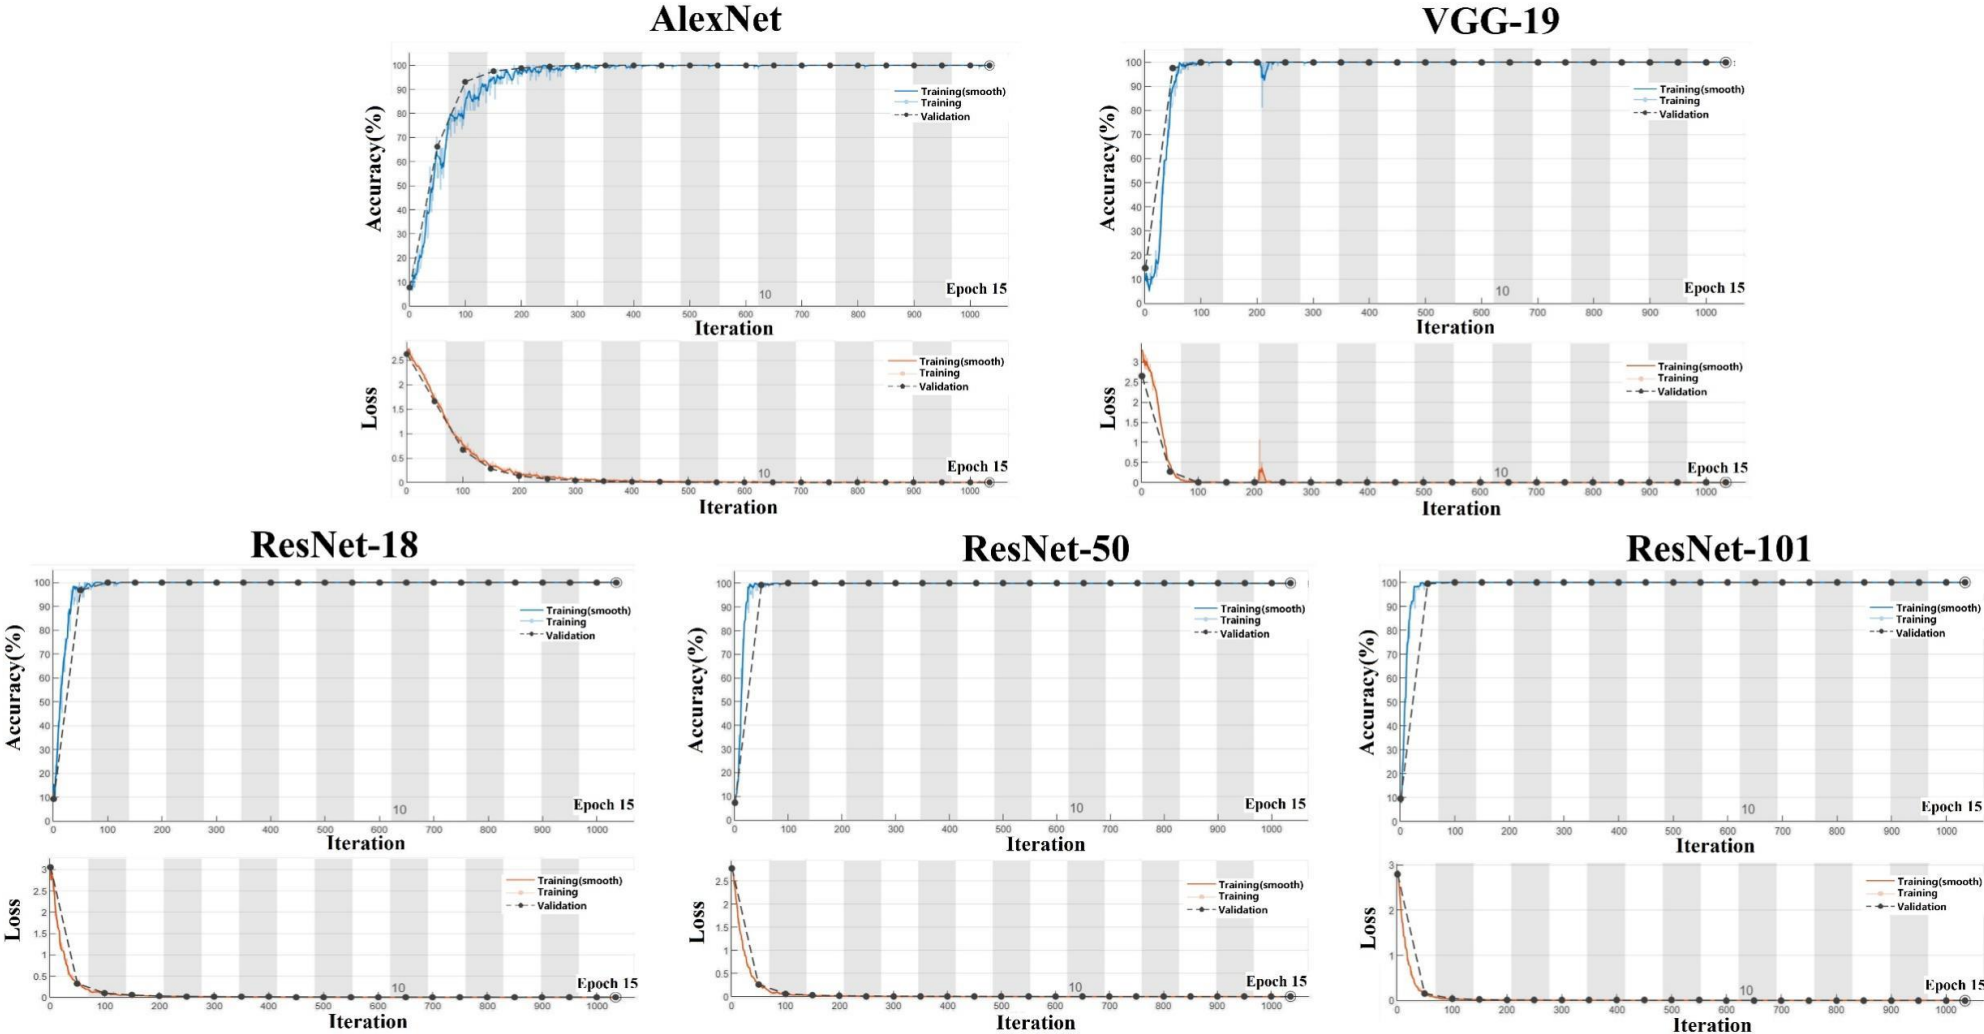

Figure.S3 Classification accuracy and cross-entropy loss for each epoch of training and validation on dataset B.

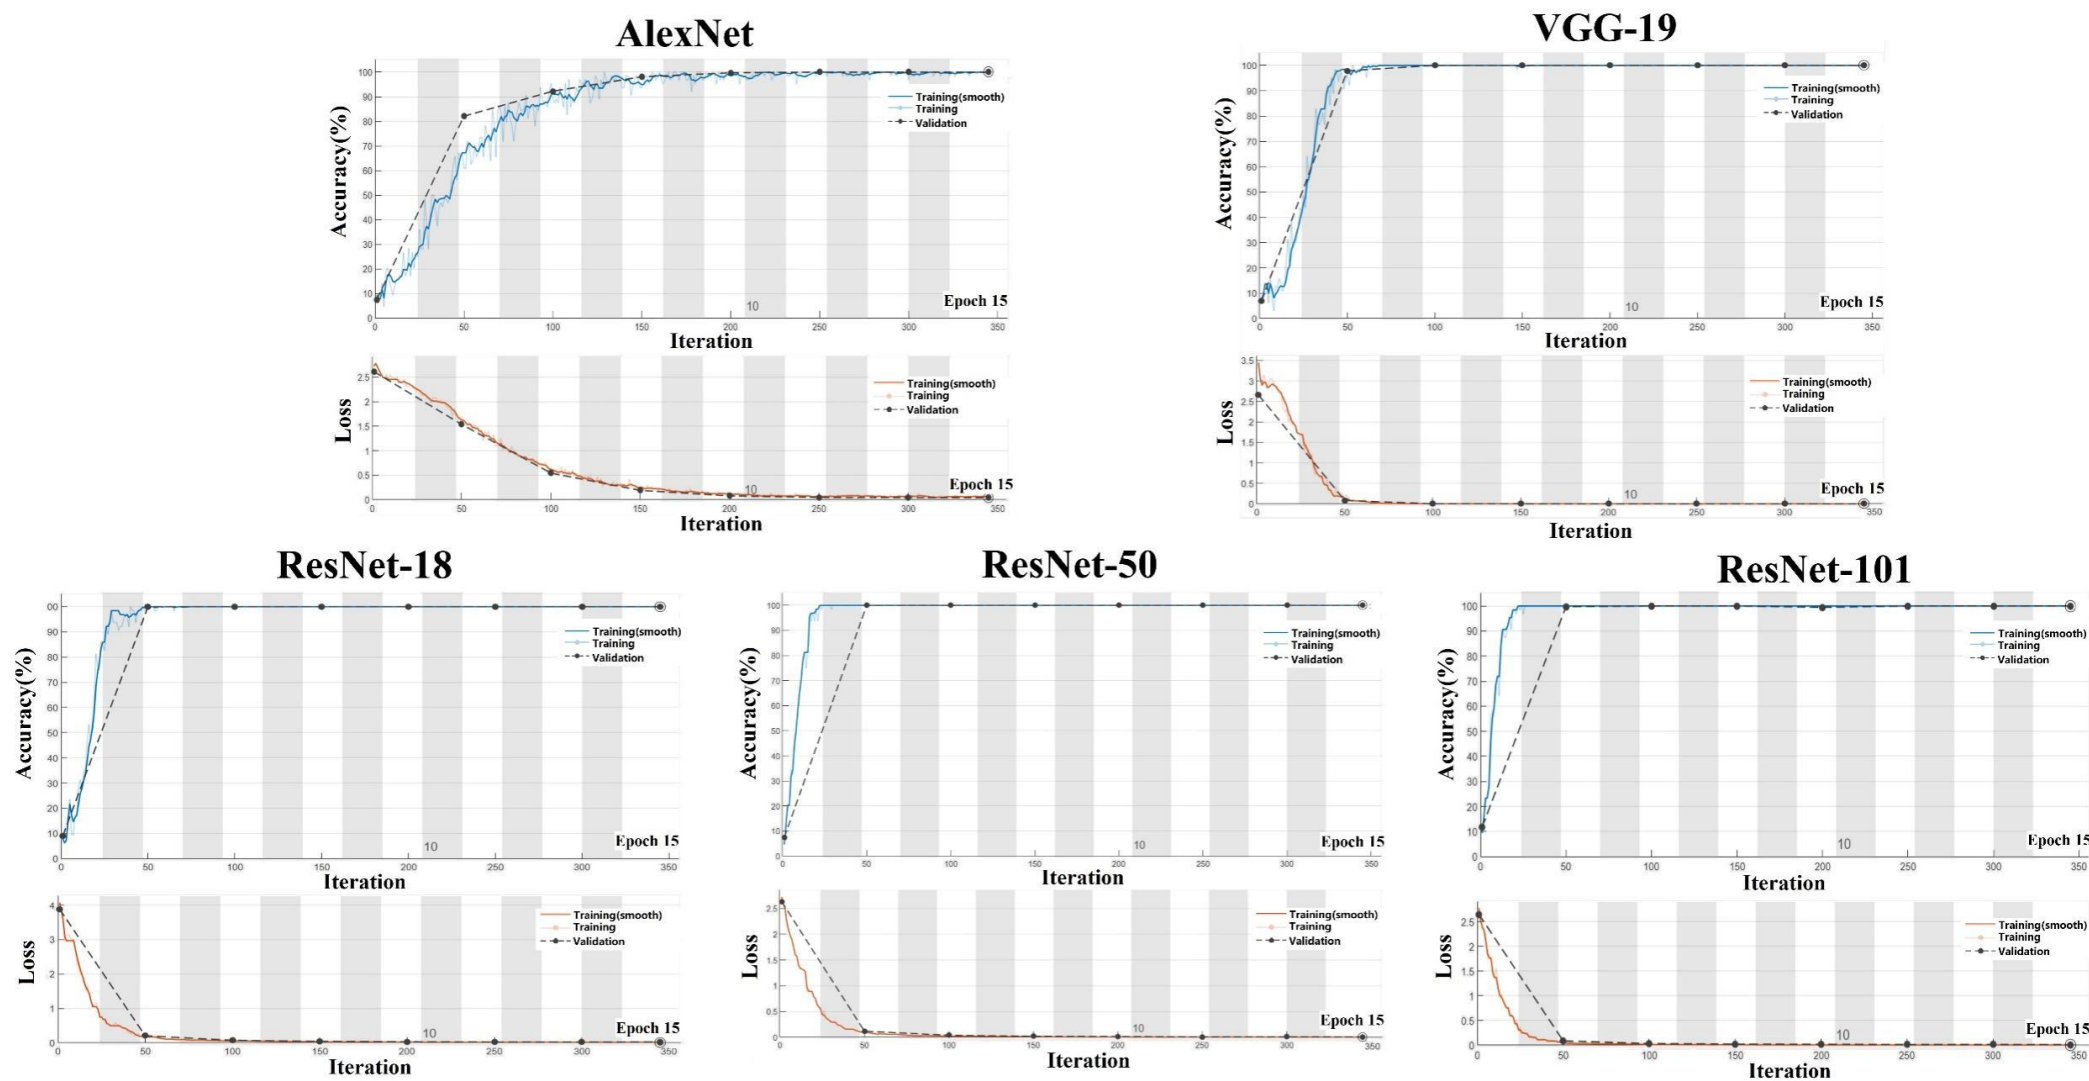

Supplement: s1 [file s1]
